# Supplementary material for: Deep phenotyping of unaffected carriers of pathogenic BMPR2 variants screened for pulmonary arterial hypertension
Source: PubMed Central journal article supplement — Eur Respir J. 2024 Oct 3;64(4):2400442. doi: 10.1183/13993003.00442-2024 (PMC11447285; doi:10.1183/13993003.00442-2024), 2024-10-03

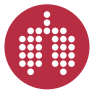

# Deep phenotyping of unaffected carriers of pathogenic *BMPR2* variants screened for pulmonary arterial hypertension

Eszter N. Tóth , Lucas R. Celant , Marili Niglas , Samara Jansen, Jelco Tramper, Nicoleta Baxan, Ali Ashek, Jeroen N. Wessels , J. Tim Marcus, Lilian J. Meijboom , Arjan C. Houweling, Esther J. Nossent , Jurjan Aman , Julien Grynblat , Frédéric Perros, David Montani , Anton Vonk Noordegraaf , Lan Zhao , Frances S. de Man and Harm Jan Bogaard

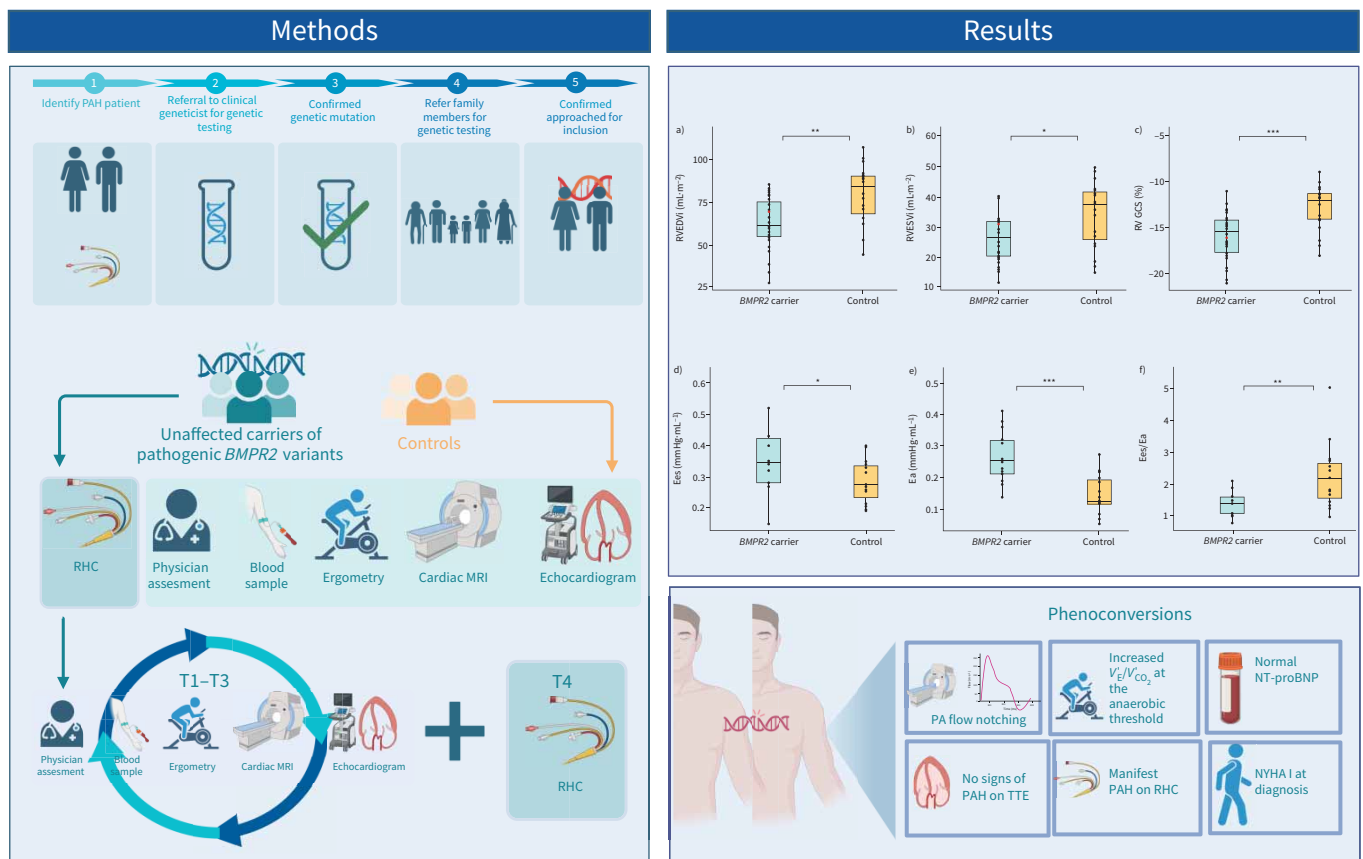

**GRAPHICAL ABSTRACT** Summary of study protocol and main study findings. Unaffected carriers (UCs) of pathogenic *BMPR2* variants and healthy family members (controls) were recruited for study participation after genetic counselling. A multimodality screening approach was employed with UCs undergoing an additional right heart catheterisation (RHC) at baseline and at the 4-year follow-up (T4). Main study findings include lower indexed right ventricular (RV) end-systolic volume (ESVi) and RV end-diastolic volume (EDVi) in UCs as well as a higher RV global circumferential strain (GCS) (red dots indicate phenoconverters). Haemodynamic and pressure–volume loop analysis showed higher RV end-systolic elastance (Ees), RV afterload (arterial elastance (Ea)) and altered RV pulmonary artery (PA) coupling (Ees/Ea) in UCs. During the study, two participants developed pulmonary arterial hypertension (PAH). MRI: magnetic resonance imaging; NT-proBNP: N-terminal pro-brain natriuretic peptide; NYHA I at diagnosis; TTE: transthoracic echocardiography;  $V̇_E$ : minute ventilation;  $V̇_{CO_2}$ : carbon dioxide production.

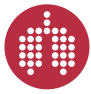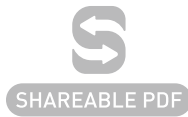

# Deep phenotyping of unaffected carriers of pathogenic *BMPR2* variants screened for pulmonary arterial hypertension

Eszter N. Tóth <sup>1,2,11</sup>, Lucas R. Celant <sup>1,2,11</sup>, Marili Niglas <sup>3</sup>, Samara Jansen <sup>1,2</sup>, Jelco Tramber <sup>1,2</sup>, Nicoleta Baxan <sup>3</sup>, Ali Ashek <sup>3</sup>, Jeroen N. Wessels <sup>1,2</sup>, J. Tim Marcus <sup>2,4</sup>, Lilian J. Meijboom <sup>1,2,4</sup>, Arjan C. Houweling <sup>5</sup>, Esther J. Nossent <sup>1</sup>, Jurjan Aman <sup>1</sup>, Julien Grynblat <sup>6,7,8,9</sup>, Frédéric Perros <sup>10</sup>, David Montani <sup>6,7,8</sup>, Anton Vonk Noordegraaf <sup>1,2</sup>, Lan Zhao <sup>3</sup>, Frances S. de Man <sup>2</sup> and Harm Jan Bogaard <sup>1,2</sup>

<sup>1</sup>Amsterdam UMC location Vrije Universiteit Amsterdam, Department of Pulmonary Medicine, Amsterdam, The Netherlands. <sup>2</sup>Amsterdam Cardiovascular Sciences, Pulmonary Hypertension and Thrombosis, Amsterdam, The Netherlands. <sup>3</sup>Imperial College London, National Heart and Lung Institute, London, UK. <sup>4</sup>Amsterdam UMC location Vrije Universiteit Amsterdam, Department of Radiology and Nuclear Medicine, Amsterdam, The Netherlands. <sup>5</sup>Amsterdam UMC location AMC, Department of Human Genetics, Amsterdam, The Netherlands. <sup>6</sup>INSERM UMR\_S 999 “Pulmonary Hypertension: Pathophysiology and Novel Therapies”, Marie Lannelongue Hospital and Bicêtre Hospital, Le Plessis-Robinson, France. <sup>7</sup>AP-HP, Department of Respiratory and Intensive Care Medicine, Pulmonary Hypertension National Referral Center, Bicêtre Hospital, Le Kremlin-Bicêtre, France. <sup>8</sup>Université Paris-Saclay, School of Medicine Gif-sur-Yvette, Gif-sur-Yvette, France. <sup>9</sup>M3C-Necker, Hôpital Necker-Enfants Malades, AP-HP, Université de Paris Cité, Cardiologie Congénitale et Pédiatrique, Paris, France. <sup>10</sup>CarMeN Laboratory, INSERM U1060, INRAE U1397, Université Claude Bernard Lyon 1, Pierre-Bénite, France. <sup>11</sup>Contributed equally.

Corresponding author: Harm Jan Bogaard ([hj.bogaard@amsterdamumc.nl](mailto:hj.bogaard@amsterdamumc.nl))

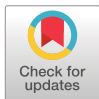

Shareable abstract (@ERSpublications)

Unaffected *BMPR2* mutation carriers have an altered cardiac phenotype, with slightly increased right ventricular contractility. In the screening of individuals susceptible to developing PAH, echocardiography and NT-proBNP are insufficient. <https://bit.ly/3xtcD0w>

Cite this article as: Tóth EN, Celant LR, Niglas M, *et al.* Deep phenotyping of unaffected carriers of pathogenic *BMPR2* variants screened for pulmonary arterial hypertension. *Eur Respir J* 2024; 64: 2400442 [DOI: 10.1183/13993003.00442-2024].

This extracted version can be shared freely online.

## Abstract

**Introduction** Pathogenic variants in the gene encoding for *BMPR2* are a major genetic risk factor for heritable pulmonary arterial hypertension. Owing to incomplete penetrance, deep phenotyping of unaffected carriers of a pathogenic *BMPR2* variant through multimodality screening may aid in early diagnosis and identify susceptibility traits for future development of pulmonary arterial hypertension.

**Methods** 28 unaffected carriers (44±16 years, 57% female) and 21 healthy controls (44±18 years, 48% female) underwent annual screening, including cardiac magnetic resonance imaging, transthoracic echocardiography, cardiopulmonary exercise testing and right heart catheterisation. Right ventricular pressure–volume loops were constructed to assess load-independent contractility and compared with a healthy control group. A transgenic *Bmpr2*<sup>Δ71Ex1/+</sup> rat model was employed to validate findings from humans.

**Results** Unaffected carriers had lower indexed right ventricular end-diastolic (79.5±17.6 mL·m<sup>-2</sup> versus 62.7±15.3 mL·m<sup>-2</sup>; p=0.001), end-systolic (34.2±10.5 mL·m<sup>-2</sup> versus 27.1±8.3 mL·m<sup>-2</sup>; p=0.014) and left ventricular end-diastolic (68.9±14.1 mL·m<sup>-2</sup> versus 58.5±10.7 mL·m<sup>-2</sup>; p=0.007) volumes than control subjects. *Bmpr2*<sup>Δ71Ex1/+</sup> rats were also observed to have smaller cardiac volumes than wild-type rats. Pressure–volume loop analysis showed that unaffected carriers had significantly higher afterload (arterial elastance 0.15±0.06 versus 0.27±0.08 mmHg·mL<sup>-1</sup>; p<0.001) and end-systolic elastance (0.28±0.07 versus 0.35±0.10 mmHg·mL<sup>-1</sup>; p=0.047) in addition to lower right ventricular pulmonary artery coupling (end-systolic elastance/arterial elastance 2.24±1.03 versus 1.36±0.37; p=0.006). During the 4-year follow-up period, two unaffected carriers developed pulmonary arterial hypertension, with normal N-terminal pro-brain natriuretic peptide and transthoracic echocardiography indices at diagnosis.

**Conclusion** Unaffected *BMPR2* mutation carriers have an altered cardiac phenotype mimicked in *Bmpr2*<sup>Δ71Ex1/+</sup> transgenic rats. Future efforts to establish an effective screening protocol for individuals at risk for developing pulmonary arterial hypertension warrant longer follow-up periods.

Copyright ©The authors 2024.

This version is distributed under the terms of the Creative Commons Attribution Non-Commercial Licence 4.0. For commercial reproduction rights and permissions contact [permissions@ersnet.org](mailto:permissions@ersnet.org)

This article has an editorial commentary: <https://doi.org/10.1183/13993003.01369-2024>

Received: 4 March 2024  
Accepted: 19 June 2024

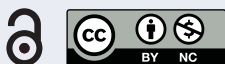

Supplement: ERJ-00442-2024.Shareable.pdf [file ERJ-00442-2024.Shareable.pdf]
